# Supplementary material for: Detection of Interlayered Illite/Smectite Clay Minerals with XRD, SEM Analyses and Reflectance Spectroscopy
Source: MDPI journal article supplement (doi:10.3390/s22093602), 2022-05-09
Supplement: s1 [file s1]

Table S1. Atom % EDS measurements Scanning Electron Microscope.

|                        | <i>O</i> | <i>Na</i> | <i>Mg</i> | <i>Al</i> | <i>Si</i> | <i>K</i> | <i>Fe</i> | <i>Cu</i> |
|------------------------|----------|-----------|-----------|-----------|-----------|----------|-----------|-----------|
| <i>04MRE123-02_pt1</i> | 61.11    | 0.80      | 0.82      | 9.38      | 20.51     | 6.28     | 1.11      | -         |
| <i>04MRE123-02_pt2</i> | 62.62    | 1.80      | 1.19      | 10.10     | 22.04     | 2.08     | 0.18      | -         |
| <i>04MRE123-02_pt3</i> | 62.97    | 1.19      | 1.22      | 10.36     | 22.19     | 1.89     | 0.20      | -         |
